# Supplementary material
Source: publisher site journal article supplement (https://www.spandidos-publications.com/844/downloadSupplementary)

Figure S1. miR-4465 is overexpressed in transfected HCT116 cells. (A) The expression levels of mature miR-4465 in UT or miR-4465 OE HCT116 cells were measured by QuantiGene miRNA assay. (B) The number of copies of mature miR-4465 per cell was calculated by interpolating the relative luminescence units measured for each setup in a standard curve generated using serial dilutions of synthetic miR-4465 positive control. UT, untransfected control; OE, overexpression vector; miR, miRNA, microRNA.

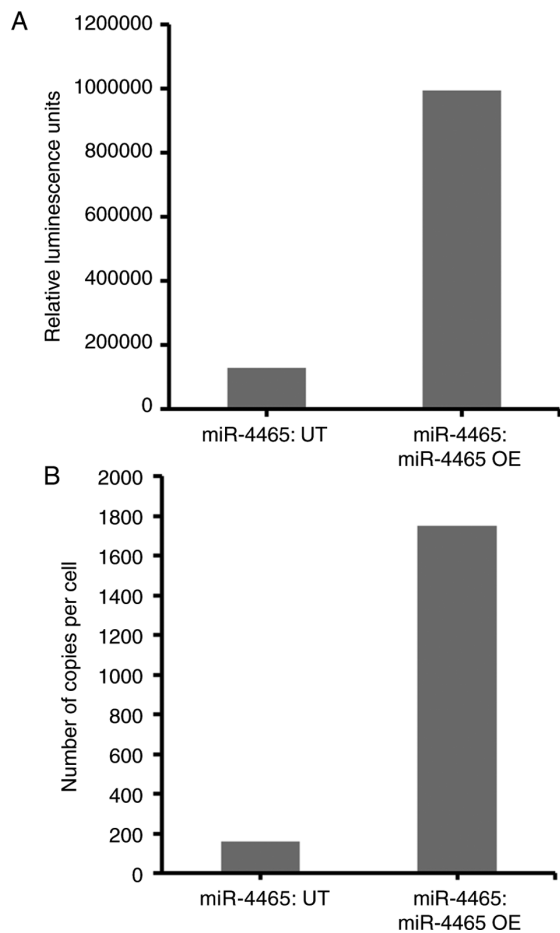

Figure S2. siRNA-mediated knockdown of DNMT3B, TET3 and PTEN determined by reverse transcription-quantitative PCR detection of relative mRNA expression normalized to GAPDH in HCT116 cells transfected with 30 nM siNEG or gene-specific siRNAs. Data are expressed as the mean  $\pm$  SD. \* $P < 0.05$ ; \*\* $P < 0.01$ . siRNA, small interfering RNA; siNEG, negative control siRNA; DNMT3B, DNA methyltransferase 3 $\beta$ ; TET3, TET methylcytosine dioxygenase 3.

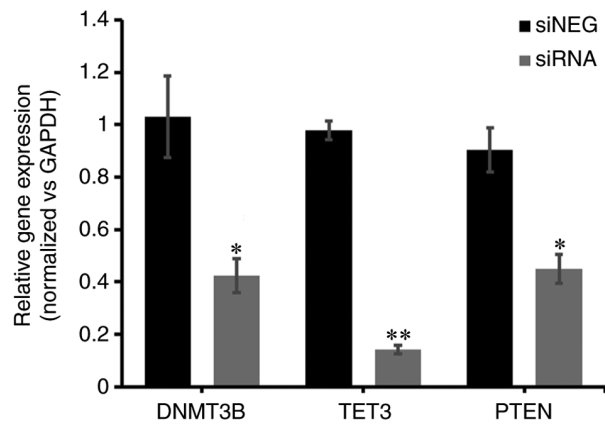

Supplement: Supplementary file 1 [file downloadSupplementary]
